# Supplementary material
Source: Royal Society of Chemistry journal article supplement (doi:10.1039/d6cp00858e)
Supplement: d6cp00858e1.pdf [file d6cp00858e1.pdf]

## Supplementary material for

# First-principles investigation of alloying element effects on Hydrogen trapping and diffusion at the $\alpha$ -Fe/VC interface and within the VC bulk

Linxian Li,<sup>a</sup> Huifang Lan,<sup>a</sup> Shuai Tang,<sup>\*a</sup> Qing Peng,<sup>b,c</sup> Zhenyu Liu<sup>a</sup> and Guodong Wang<sup>a</sup>

<sup>a</sup> State Key Laboratory of Digital Steel, Northeastern University, Shenyang 110819, China.

<sup>b</sup> School of Power and Mechanical Engineering, Wuhan University, Wuhan 430072, China.

<sup>c</sup> Xinyan Semi Technology Co. Ltd, Wuhan, 430075, China.

*\*Corresponding authors:*

*Shuai Tang, Email: tangshuai@ral.neu.edu.cn;*

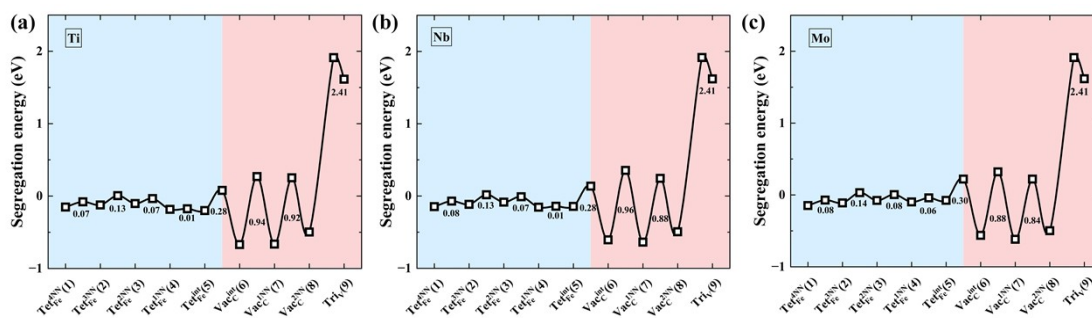

Fig. S1 Diffusion pathways and corresponding energy barriers for a H atom migrating from the Fe side into the VC side. Energy barriers in the interface doped with (a) Ti, (b) Nb, and (c) Mo.

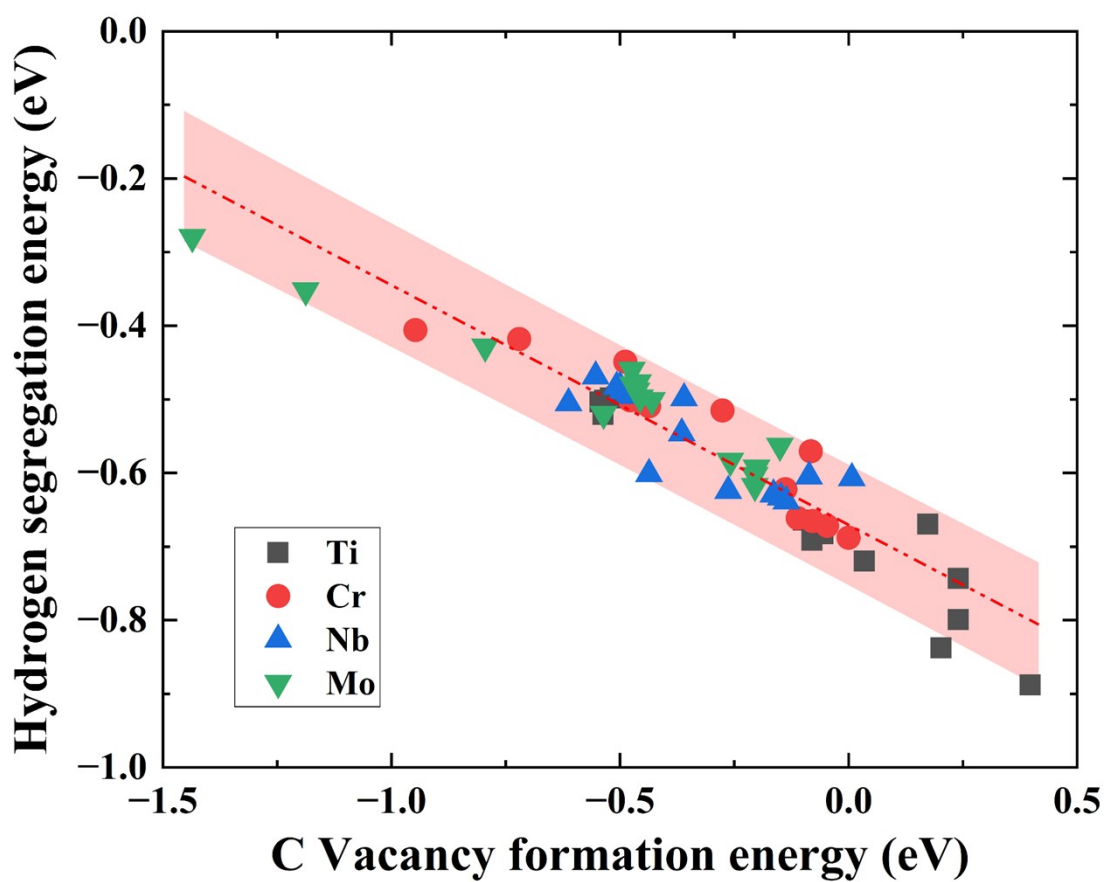

Fig. S2 The relationship between C vacancy formation energy and hydrogen segregation energy.
